# Peripheral Nerve Injury Alters the $\alpha_2$ Adrenoceptor Subtype Activated by Clonidine for Analgesia

Frédéric Duflo, M.D.,\* Xinhui Li, Ph.D.,† Carsten Bantel, M.D.,‡ Carlo Pancaro, M.D.,§ Michelle Vincler, Ph.D.,† James C. Eisenach, M.D.||

**Background:** Previous studies suggest that the  $\alpha_{2A}$  adrenoceptor subtype is the target for spinally administered  $\alpha_2$ -adrenergic agonists, i.e., clonidine, for pain relief. However, ST 91, a preferential  $\alpha_{2\text{NON-A}}$  adrenoceptor subtype agonist, induces antinociception, and intrathecally administered  $\alpha_{2C}$  antisense oligodeoxynucleotide decreases antinociception induced by clonidine in the rat, suggesting non-A sites may be important as well. Therefore, the authors examined the subtype of  $\alpha_2$  adrenoceptor activated by clonidine and ST 91 in normal rats and those with nerve injury–induced hypersensitivity.

**Methods:** The same mechanical stimulus was applied to normal rats and those following spinal nerve ligation, and the effect of intrathecal clonidine and ST 91 on withdrawal threshold to the stimulus was determined. To further examine subtypes, animals were spinally pretreated with vehicle, BRL 44408 (an  $\alpha_{2A}$  subtype–preferring antagonist), and ARC 239 (an  $\alpha_{2\text{NON-A}}$  subtype–preferring antagonist).

**Results:** In normal animals, clonidine's effect was diminished by pretreatment with either antagonist, whereas ST 91's antinociceptive effect was solely blocked by pretreatment with ARC 239. In nerve-injured animals, the antihypersensitivity action of both clonidine and ST 91 was blocked by administration of ARC 239, whereas BRL 44408 was ineffective.

**Conclusions:** These data agree with previous studies supporting that the  $\alpha_{2A}$  adrenoceptor is important to the antinociceptive effect of clonidine in normal animals. Nerve injury alters this and results in a total reliance on  $\alpha_{2\text{NON-A}}$  adrenoceptors.

INJURY to peripheral nerves may result in neuropathic pain, which is characterized by spontaneous persistent pain and hypersensitivity to both mechanical and thermal stimuli, often resistant to treatment with conventional analgesics or with traditional agents, such as opioids.<sup>1</sup> Spinal administration of  $\alpha_2$  adrenoceptor agonists,

such as clonidine, produces antinociception both in animals and humans.<sup>2</sup> Thus, the use of the  $\alpha_2$  adrenoceptor agonists has become an interesting alternative to currently used analgesics because they lack respiratory depressant effects and addictive liability. Epidural clonidine for cancer pain was the first analgesic specifically approved for the treatment of neuropathic pain. Epidural or intrathecal administration of clonidine is limited because of side effects, mainly hypotension, bradycardia, and sedation, reflecting actions on the  $\alpha_{2A}$  adrenoceptors. Unfortunately, initial molecular biologic or radioligand binding studies suggested that the  $\alpha_{2A}$  adrenoceptor is also the target for analgesia from spinally administered  $\alpha_2$  agonists.<sup>3,4</sup> Moreover, analgesic effects are lost in  $\alpha_{2A}$  but not  $\alpha_{2\text{NON-A}}$  knockout mice,<sup>5,6</sup> and by  $\alpha_{2A}$  knockdown by intrathecal administration of specific antisense oligodeoxynucleotide (ODN) to this subtype.<sup>7</sup>

Other work supports a potential role for  $\alpha_{2\text{NON-A}}$  adrenoceptor subtypes in some circumstances. For example,  $\alpha_{2A}$  adrenoceptor expression is decreased, but  $\alpha_{2C}$  is maintained after peripheral nerve injury in rats.<sup>8,9</sup> In addition, a recent study showed that spinally administered,  $\alpha_{2C}$  antisense (ODN) administration decreased mechanical antinociception induced by clonidine in rats.<sup>10</sup> A problem with previous studies comparing normal to nerve-injured animals is that different test stimuli are applied to each group. In an attempt to clarify the involvement of  $\alpha_2$  adrenoceptor subtypes in normal rats and after peripheral nerve injury, we exposed both groups to the same mechanical stimulus and used subtype-preferring agonists and antagonists to define the subtypes involved.

This article is featured in "This Month in Anesthesiology." Please see this issue of ANESTHESIOLOGY, page 6A.

\* Visiting Research Fellow, Department of Anesthesiology and Intensive Care Unit, Hôpital de l'Hôtel-Dieu, Lyon, France. † Postdoctoral Research Fellow, ‡ Visiting Research Fellow, Department of Anesthesiology and Intensive Care, University Hospital, Muenster, Germany. § Visiting Research Fellow, Department of Anesthesiology and Intensive Care, University Perugia, Perugia, Italy. || F.M. James III Professor of Anesthesiology, Department of Anesthesiology and Center for the Study of Pharmacologic Plasticity in the Presence of Pain, Wake Forest University School of Medicine.

Received from the Department of Anesthesiology and Center for the Study of Pharmacologic Plasticity in the Presence of Pain, Wake Forest University School of Medicine, Winston-Salem, North Carolina. Submitted for publication January 22, 2002. Accepted for publication April 29, 2002. Supported in part by the French National Academy of Medicine, Paris, France; the Philippe Foundation Inc., New York, New York; and grant Nos. GM 35523 and NS 41386 from the National Institutes of Health, Bethesda, Maryland.

Address reprint requests to Dr. Duflo: Department of Anesthesiology, Wake Forest University School of Medicine, Medical Center Boulevard, Winston-Salem, North Carolina 27157-1009. Address electronic mail to: fduflo@wfubmc.edu. Individual article reprints may be purchased through the Journal Web site, www.anesthesiology.org.

## Materials and Methods

All surgical preparations and experimental protocols were approved by the Animal Care and Use Committee of Wake Forest University School of Medicine (Winston-Salem, North Carolina).

### Surgical Preparation

Male rats (Harlan Sprague-Dawley) weighing 250–300 g were used in this study. Under halothane anesthesia, the left L5 and L6 spinal nerves were isolated and ligated tightly with 4-0 silk sutures, as previously described.<sup>11</sup> Animals recovered for 5–7 days; then, intrathecal catheters were inserted under halothane anesthesia as previously described.<sup>12</sup> Catheters were advanced 8 cm caudally through an incision in the cisternal membrane and

secured to the musculature at the incision site. Only animals with no evidence of neurologic deficit after catheter insertion were studied. All the pharmacologic experiments were conducted between 3 and 4 weeks after spinal nerve ligation, a time of stable hypersensitivity to mechanical stimuli. Normal animals had intrathecal catheters but did not undergo spinal nerve ligation.

### *Behavioral Testing*

The nociceptive flexion reflex was quantified with a Ugo Basile Analgesymeter (Stoelting, Chicago, IL), which applies a linearly increasing force to the hind paw of the lightly restrained animal. During the week preceding experiments, rats were habituated to the device and tested at 5-min intervals for 1 h each day. This adaptation procedure reduces variability, produces a more stable baseline paw withdrawal threshold, and enhances the ability to detect effects of treatments.<sup>13</sup> On the day of the experiment, rats were exposed to the test stimulus at 5-min intervals for 1 h. The baseline threshold was defined as the mean of the last six determinations before injection of test agents. A cutoff of 250 g was used to avoid tissue damage.

### *Drugs and Their Administration*

$\alpha_2$  Adrenoceptor agonists used in this study were clonidine hydrochloride (non-subtype selective; Sigma Chemical, St. Louis, MO) and ST91 ( $\alpha_2$   $\text{NON-A}$ -preferring; Boehringer Ingelheim, Ridgefield, CT). Animals received cumulative dosing, at 40-min intervals, of intrathecal clonidine (19, 75, 190 nmol) or, at 60 min intervals, of intrathecal ST 91 (10, 40, 100 nmol). Timing of cumulative injections was determined by pilot experiments with either drug. Dose-response curves were constructed from percent maximum possible effect.

Percent maximum possible effect was defined as:  $100 \times (\text{postdrug response} - \text{baseline}) / (\text{cutoff threshold or pre-nerve injury threshold} - \text{baseline})$ . Agonists were administered intrathecally in volumes of 10  $\mu\text{l}$ , and thresholds for withdrawal were determined at 40 min after clonidine administration and 60 min after ST91 injection.

$\alpha_{2A}$  Adrenoceptor subtype antagonists were BRL 44408, a selective  $\alpha_{2A}$  adrenoceptor subtype antagonist, and ARC 239, a selective  $\alpha_2$   $\text{NON-A}$  adrenoceptor subtype antagonist (both from Tocris Cockson Inc., Ballwin, MO). Antagonists or vehicles were injected spinally in volumes of 10  $\mu\text{l}$  prior to agonists. Based on pilot experiments, we used probe doses of clonidine of 56 nmol (15  $\mu\text{g}$ ) and ST 91 of 40 nmol (20  $\mu\text{g}$ ). Doses of antagonists were 0.1, 1, or 5 times the equimolar dose of agonist ( $n = 6$  or 8 in each dose). All studies were conducted with the investigator blinded to drug administered. Drugs were dissolved in normal saline or, when necessary, in 2-hydroxypropyl- $\beta$ -cyclodextrin (Sigma Chemical).

### *Statistical Analysis*

Data are represented as mean  $\pm$  SD. Paw withdrawal thresholds in response to mechanical stimulation before and after nerve ligation were compared using a paired Student  $t$  test. Effects of individual drugs on paw pressure threshold withdrawal were determined using a two-way analysis of variance for repeated measures followed by the Bonferroni correction for appropriate multiple comparisons.  $P < 0.05$  was considered significant.

## **Results**

Paw pressure withdrawal threshold before spinal nerve ligation was  $130 \pm 14.6$  g. The mechanical threshold decreased significantly ( $67 \pm 11.3$  g) within 2 weeks after surgery and was stable thereafter.

### *Antinociceptive Effect of Clonidine and ST 91 in Normal Rats*

Clonidine and ST 91 produced antinociception to mechanical pressure stimulus in a equipotent manner with a significantly greater efficacy of ST 91 (fig. 1, upper panel). Larger doses of clonidine could not be studied due to intense behavioral sedation.

### *Antagonism of Clonidine and ST 91 in Normal Rats*

Intrathecal injection of 56 nmol clonidine increased the withdrawal threshold significantly 40 min after injection (figs. 2A and B). Intrathecal injection of BRL 44408 (5.6 and 56 nmol) or ARC 239 (5.6 and 56 nmol) significantly inhibited the antinociceptive effect of intrathecal clonidine in a dose-dependent manner (figs. 2A and B).

Intrathecal injection of 40 nmol ST 91 significantly increased the withdrawal threshold 60 min after injection (figs. 3A and B). Intrathecal injection of BRL 44408 (40 and 200 nmol) did not influence the antinociceptive effect of ST 91 (fig. 3A). In contrast, intrathecal injection of ARC 239 (40 and 400 nmol) inhibited the antinociceptive effect of intrathecal ST 91 in a dose-dependent manner (fig. 3B). Intrathecal injection of vehicle or either antagonist failed to alter the withdrawal threshold (control time points: figs. 2 and 3).

### *Antinociceptive Effect of Clonidine and ST 91 after Peripheral Nerve Injury*

Clonidine and ST 91 reduced antihypersensitivity to mechanical pressure stimulus testing in an equipotent manner (fig. 1, lower panel). ST 91, but not clonidine, was able to return paw withdrawal threshold to pre-nerve injury values.

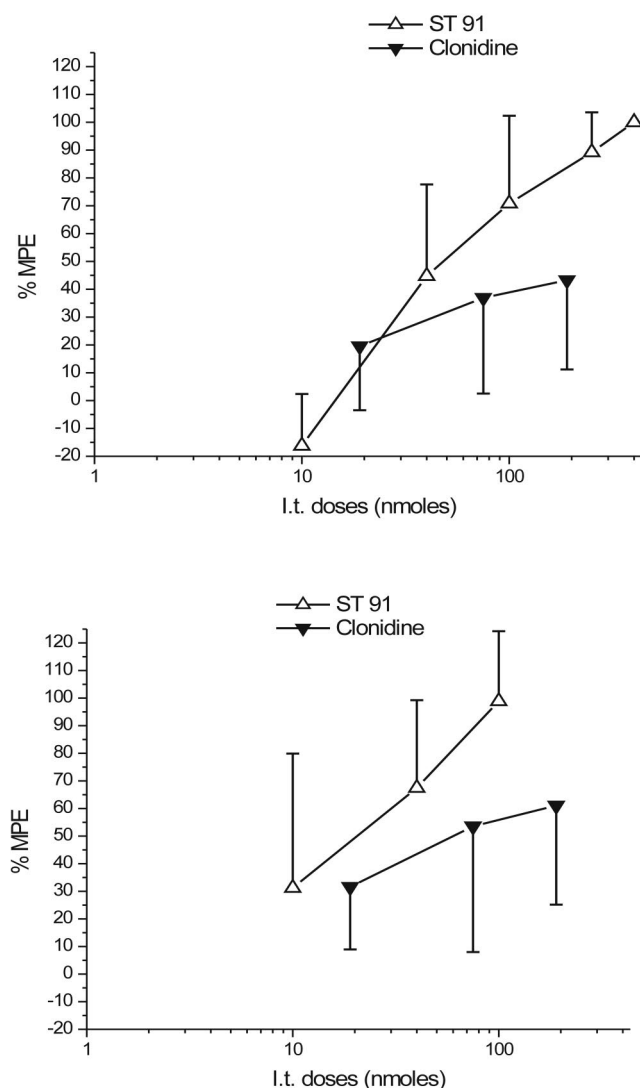

Fig. 1. Dose-response curves for the effects of intrathecally administered clonidine and ST 91 on the pressure nociceptive threshold in normal animals (upper panel) and in nerve-injured animals (lower panel). The response is presented as percent maximum possible effect (% MPE) versus dose in nanomoles. Each point on the graph represents the mean  $\pm$  SD of 7–9 animals.

#### Antagonism of Clonidine and ST 91 in Animals after Peripheral Nerve Injury

Intrathecal injection of 56 nmol clonidine increased the paw pressure withdrawal threshold significantly 40 min after injection (figs. 4A and B). Intrathecal injection of BRL 44408 (56 and 280 nmol) failed to inhibit the effect of intrathecal clonidine in a dose-dependent manner (fig. 4A). In contrast, intrathecal injection of ARC 239 (5.6 and 56 nmol) significantly inhibited the antihypersensitivity effect of intrathecal clonidine in a dose-dependent manner (fig. 4B). Greater doses of BRL 44408 were not possible to evaluate due to transient excitability.

Intrathecal injection of 40 nmol ST 91 significantly increased the withdrawal threshold 60 min after injection (figs. 5A and B). Intrathecal injection of BRL 44408

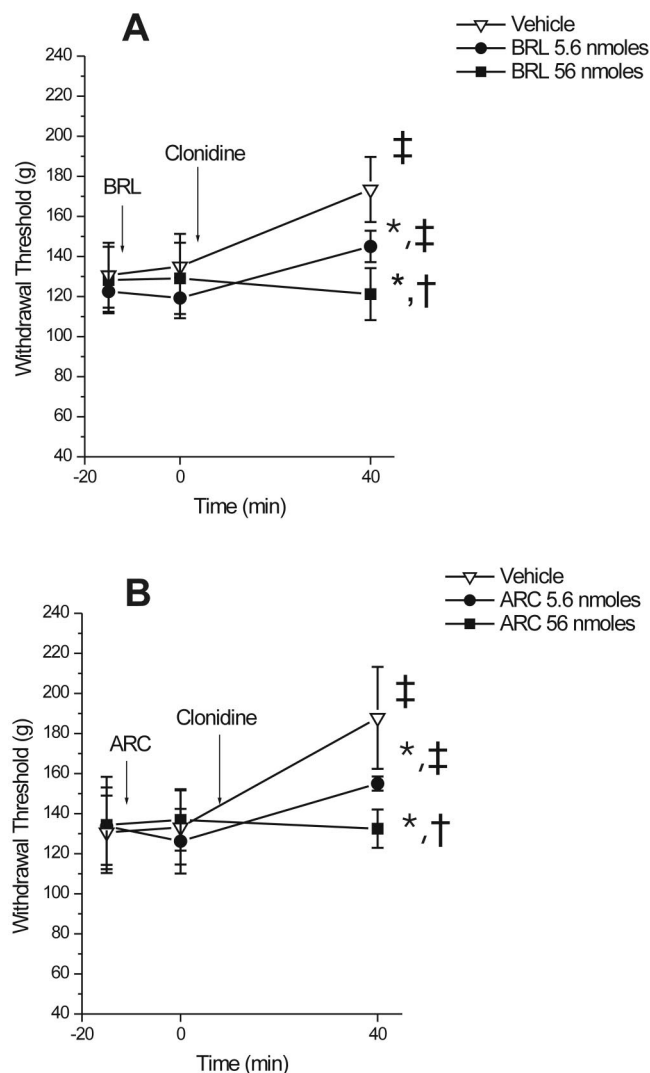

Fig. 2. Effect of intrathecal pretreatment with vehicle, BRL 44408 ( $\alpha_{2A}$  subtype-preferring antagonist, A, upper panel), and ARC 239 ( $\alpha_{2 \text{ NON-A}}$  subtype-preferring antagonist, B, lower panel) on the antinociceptive effect of intrathecal injection of 56 nmol clonidine in normal animals. Data are mean  $\pm$  SD of 6–8 animals. \* $P$  < 0.05 versus vehicle. † $P$  < 0.05 versus 5.6-nmol dose of BRL ( $\alpha_{2A}$  subtype-preferring antagonist, A, upper panel) or 5.6-nmol dose of ARC ( $\alpha_{2 \text{ NON-A}}$  subtype-preferring antagonist, B, lower panel). ‡ $P$  < 0.05 versus baseline and time 0.

(40 and 200 nmol) failed to alter the antinociceptive effect of ST 91 (fig. 5A). In contrast, intrathecal injection of ARC 239 (40 and 400 nmol) significantly inhibited the antinociceptive effect of intrathecal ST 91 in a dose-dependent manner (fig. 5B). Intrathecal injection of vehicle or either antagonist failed to alter the withdrawal threshold (control time points: figs. 4 and 5).

#### Discussion

The current study, the first to examine the effect of  $\alpha_2$  adrenoceptor agonists using the same noxious mechanical stimulus in both normal animals and nerve-injured

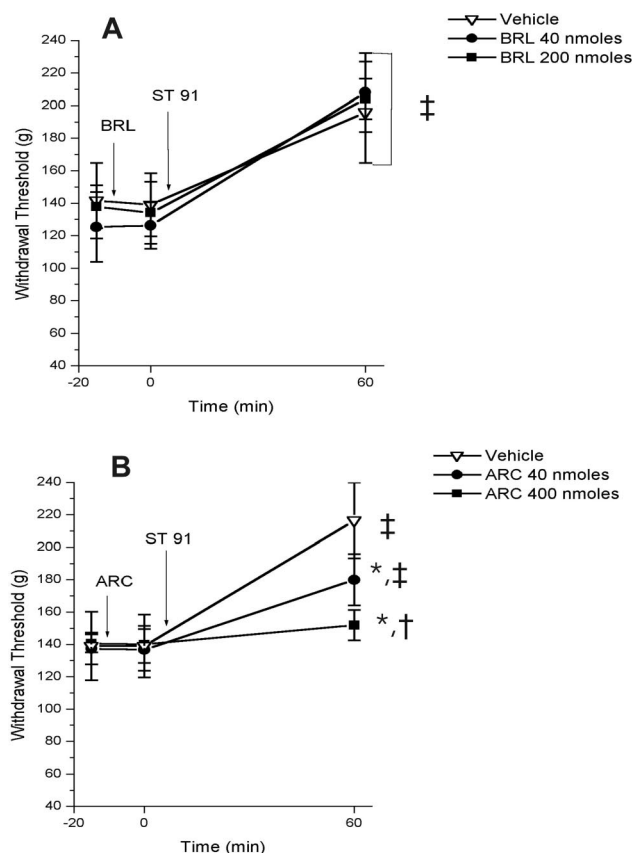

**Fig. 3.** Effect of intrathecal pretreatment with vehicle, BRL 44408 ( $\alpha_{2A}$  subtype–preferring antagonist, *A*, upper panel), and ARC 239 ( $\alpha_{2\text{NON-A}}$  subtype–preferring antagonist, *B*, lower panel) on the antinociceptive effect of intrathecal injection of 40 nmol ST 91 in normal animals. Data are mean  $\pm$  SD of 6–8 animals. \* $P$  < 0.05 versus vehicle. † $P$  < 0.05 versus 40-nmol dose of ARC. ‡ $P$  < 0.05 versus baseline and time 0.

animals, provides new experimental evidence indicating that the antihypersensitivity effect produced by intrathecally administered clonidine in neuropathic pain depends primarily on its interaction with  $\alpha_{2\text{NON-A}}$  adrenoceptor subtypes in the spinal cord, whereas in normal rats, the antinociceptive action of clonidine is mediated by both  $\alpha_{2A}$  and  $\alpha_{2\text{NON-A}}$  adrenoceptor subtypes. Should these data apply to humans, this suggests that it may be possible to separate analgesia in patients with neuropathic pain from unwanted side effects due to  $\alpha_{2A}$  adrenoceptor activation (sedation, cardiovascular depression).

We chose a pharmacologic approach to define roles of  $\alpha_2$  adrenoceptor subtypes in mediating analgesia in normal and nerve-injured animals. We are aware that resolution of the functions specific to each  $\alpha_2$  adrenoceptor subtype is difficult due to lack of perfectly selective pharmacologic tools. However, the antagonists we employed distinguish reasonably well between  $\alpha_{2A}$  and  $\alpha_{2A\text{NON-A}}$  adrenoceptor subtypes.<sup>14</sup>

The current study suggests that intrathecal clonidine produces antinociception in normal rats by interacting with both  $\alpha_{2A}$  and  $\alpha_{2A\text{NON-A}}$  adrenoceptor subtypes. This

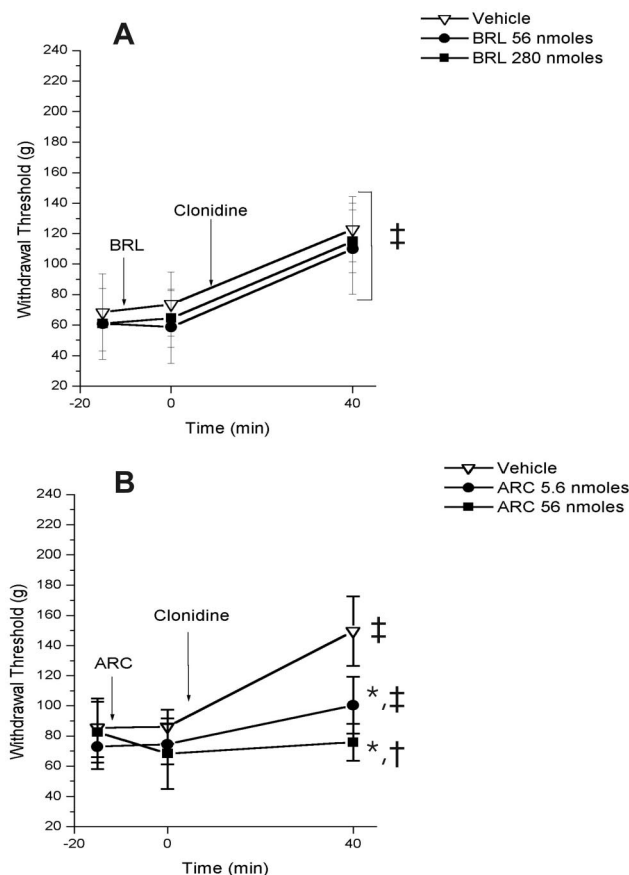

**Fig. 4.** Effect of intrathecal pretreatment with vehicle, BRL 44408 ( $\alpha_{2A}$  subtype–preferring antagonist, *A*, upper panel), and ARC 239 ( $\alpha_{2\text{NON-A}}$  subtype–preferring antagonist, *B*, lower panel) on the antihypersensitivity effect of intrathecal injection of 56 nmol clonidine in injured animals. Data are mean  $\pm$  SD of 6–8 animals. \* $P$  < 0.05 versus vehicle. † $P$  < 0.05 versus 5.6-nmol dose of ARC. ‡ $P$  < 0.05 versus baseline and time 0.

is somewhat discrepant from previous work. For example,  $\alpha_{2A}$  adrenoceptor mRNA or immunoreactivity predominates in the spinal cord of normal rats and is mostly located in the superficial dorsal horn, whereas the  $\alpha_{2C}$  adrenoceptor subtype immunoreactivity is mostly present in the ventral horn area.<sup>4,15–17</sup> Other pharmacologic studies in mice support an exclusive role of  $\alpha_{2A}$  adrenoceptor subtypes to produce antinociception.<sup>18</sup> Finally, studies using transgenic mice or antisense ODN injections in rats support an analgesic action of  $\alpha_2$  adrenoceptor agonists primarily mediated by the  $\alpha_{2A}$  adrenoceptor subtype under normal conditions.<sup>5–7,19</sup> In those studies,  $\alpha_2$  adrenoceptor agonists lost their analgesic action in knockout mice lacking the  $\alpha_{2A}$  adrenoceptor subtype or in animals treated with  $\alpha_{2A}$  adrenoceptor subtype antisense ODN, whereas this effect was not reduced in the mice lacking the  $\alpha_{2C}$  adrenoceptor subtype or in animals treated with  $\alpha_{2C}$  adrenoceptor subtype antisense ODN. Several factors could account for the apparent discrepancy between these results and ours in normal animals. The amount of mRNA in tissue need

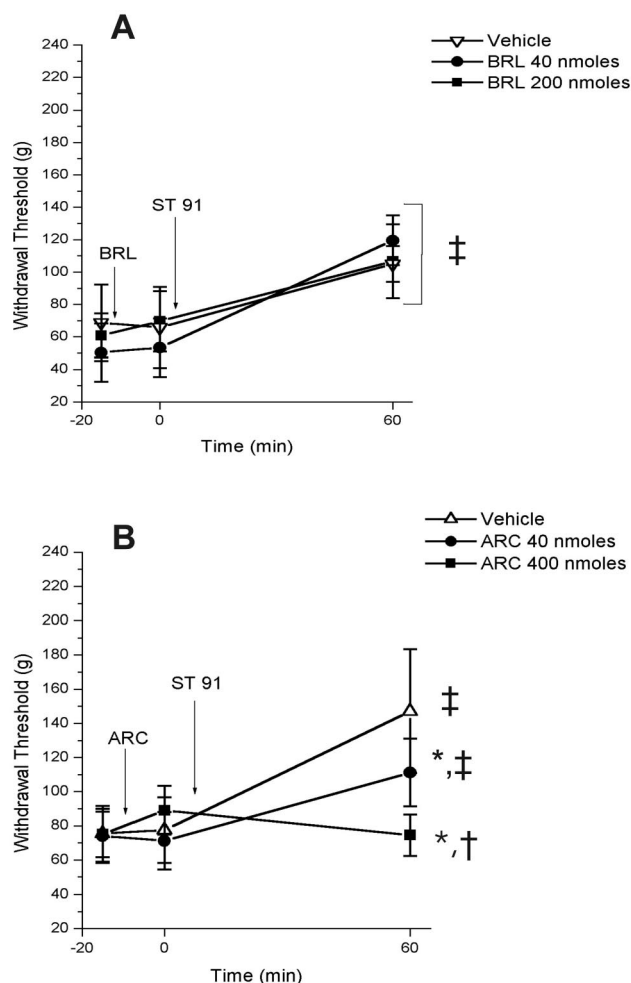

**Fig. 5.** Effect of intrathecal pretreatment with vehicle, BRL 44408 ( $\alpha_{2A}$  subtype–preferring antagonist, *A*, upper panel), and ARC 239 ( $\alpha_{2 \text{ NON-A}}$  subtype–preferring antagonist, *B*, lower panel) on the antihypersensitivity effect of intrathecal injection of 40 nmol ST 91 following peripheral nerve injury. Data are mean  $\pm$  SD of 6–8 animals. \* $P < 0.05$  versus vehicle. † $P < 0.05$  versus 40 nmol ARC 239. ‡ $P < 0.05$  versus baseline and time 0.

not reflect the relative amount of functional receptor protein. Moreover, previous behavioral studies have evaluated the effect of  $\alpha_2$  adrenoceptor agonists by using hot-plate or tail-flick tests, studying thermally evoked C-fiber activity. Although these techniques are validated in assessing antinociception to thermal stimuli, they may not reflect results from mechanical stimuli, such as the paw pressure used in our normal animals. Studies of genetically modified reagents may also provide misleading information. First, the knockout animals had the opportunity to adapt to the deficiency during their development, and mice have different spinal noradrenergic anatomy than other species, such as rats or humans (Weiya Ma, Ph.D., Assistant Professor of Anesthesiology, Wake Forest University School of Medicine, personal oral communication and submitted data, January 2002). Second, in the case of the studies using antisense ODNs,

the authors failed to prove that they had selectively reduced expression of the cognate protein in the spinal cord (e.g., Western blot), while the administration of sense ODN resulted in altered behavioral function.<sup>7</sup>

Other previous work supports the concept that antinociception could be mediated by  $\alpha_{2 \text{ NON-A}}$  adrenoceptor subtypes. Prazosin, which is not only a highly selective  $\alpha_1$  antagonist but also a preferential  $\alpha_{2 \text{ NON-A}}$  adrenoceptor subtype antagonist, inhibits the effect of clonidine on the release of substance P.<sup>20</sup> In addition, ST 91 induces antinociception in rats when administered spinally,<sup>21</sup> and this effect is blocked by prazosin. Subsequently, dense and similar immunoreactivity for both  $\alpha_{2A}$  and  $\alpha_{2C}$  adrenoceptor subtypes was recently demonstrated in the superficial layers of the rat spinal cord, suggesting that both  $\alpha_{2A}$  and  $\alpha_{2C}$  adrenoceptor subtypes are present in spinal cord regions related to nociception.<sup>8,9</sup>

Our data from injured animals suggest that the antihypersensitivity action of clonidine is mediated by interacting with  $\alpha_{2A \text{ NON-A}}$  adrenoceptor subtypes solely. This is not entirely consistent with a previous study suggesting a predominant role of  $\alpha_{2A}$  adrenoceptor subtype in inhibition after nerve injury.<sup>22</sup> In that study, the agonist structure–activity relationship suggested an  $\alpha_{2A}$  adrenoceptor subtype, and clonidine's effect was not reversed by the  $\alpha_{2A \text{ NON-A}}$ -preferring antagonist, prazosin. However, the effect of specific  $\alpha_2$  adrenoceptor antagonist subtypes (i.e., ARC 239 or BRL 44408) on the  $\alpha_2$  adrenoceptor agonists, or antagonist dose responses, were not examined. Later, Malmberg *et al.*<sup>23</sup> have recently studied the contribution of the  $\alpha_2$  adrenoceptor subtypes to the development of neuropathic pain after partial sciatic nerve ligation in genetically altered mice. The authors showed that dexmedetomidine reduced mechanical hypersensitivity in  $\alpha_{2 \text{ NON-A}}$  adrenoceptor knockout mice, but its action was preserved in  $\alpha_{2A}$  adrenoceptor subtype knockout animals. However, as noted above, mice have distinctly different spinal cord anatomy of noradrenergic systems, and these authors did not evaluate the action of ST 91.

Several observations support the current study to suggest a plasticity in  $\alpha_2$  adrenoceptor subtype inhibition after peripheral nerve injury. First,  $\alpha_{2A}$  adrenoceptor subtype immunoreactivity, likely located on C-fibers terminals, decreases dramatically in the rat spinal cord ipsilateral to the injury following sciatic nerve transection, chronic constriction injury of the sciatic nerve, or L5–L6 spinal nerve ligation.<sup>8</sup> Of course, one would not expect mechanical hypersensitivity to be transduced by C-fibers to begin with. Second, in the same study, there was a significant increase in dorsal spinal cord  $\alpha_{2C}$  adrenoceptor subtype immunoreactivity ipsilateral to injury following nerve ligation compared with sham animals. Also, Khasar *et al.*<sup>24</sup> previously showed that in acute inflammatory pain models,  $\alpha_{2 \text{ NON-A}}$  adrenoceptor subtype antagonists but not  $\alpha_{2A}$  adrenoceptor subtype an-

tagonists were able to reverse the inhibitory effect of clonidine using the paw pressure stimulus. In support of these findings, more subtype-specific approaches showed that intrathecally administered,  $\alpha_C$  adrenoceptor subtype ODN significantly attenuated clonidine's antinociceptive effect following hind paw inflammation.<sup>25</sup> Finally, in  $\alpha_{2C}$  knockout mice, an  $\alpha_{2 \text{ NON-A}}$  subtype-prefering agonist spinally administered was not able to produce analgesia after intrathecal injection of substance P.<sup>10</sup> In this case, the cognate protein (*i.e.*,  $\alpha_{2 \text{ NON-A}}$  adrenoceptor subtype) was shown to be reduced after ODN treatment.

In summary, the current pharmacologic study shows that intrathecally administered clonidine produces antinociception in normal rats through interaction with both  $\alpha_{2A}$  and  $\alpha_{2 \text{ NON-A}}$  adrenoceptor subtypes. In contrast, after nerve injury, clonidine acts solely *via*  $\alpha_{2 \text{ NON-A}}$  adrenoceptor subtypes. This result, plus the efficacy of ST 91, which is devoid of hypotensive or sedative side effects,<sup>26,27</sup> could lead the way to a better use of  $\alpha_2$  adrenoceptor agonists for analgesia in patients with chronic pain.

## References

- MacFarlane BV, Wright A, O'Callaghan J, Benson HA: Chronic neuropathic pain and its control by drugs. *Pharmacol Ther* 1997; 75:1-19
- Eisenach JC, De Kock M, Klimscha W:  $\alpha_2$ -Adrenergic agonists for regional anesthesia: A clinical review of clonidine (1984-1995). *ANESTHESIOLOGY* 1996; 85:655-74
- Uhlén S, Wikberg JES: Rat spinal cord  $\alpha_2$ -adrenoceptors are of the  $\alpha_{2A}$  subtype: Comparison with  $\alpha_{2A}$  and  $\alpha_{2B}$ -adrenoceptors in rat spleen, cerebral cortex and kidney using 3H-RX821002 ligand binding. *Pharmacol Toxicol* 1991; 69:341-50
- Nicholas AP, Pieribone V, Hökfelt T: Distributions of mRNAs for alpha-2 adrenergic receptor subtypes in rat brain: An in situ hybridization study. *J Comp Neurol* 1993; 328:575-94
- Lakhlani PP, MacMillan LB, Guo TZ, McCool BA, Lovinger DM, Mervyn M, Limberd LE: Substitution of a mutant  $\alpha_{2A}$ -adrenergic receptor via "hit and run" gene targeting reveals the role of this subtype in sedative, analgesic, and anesthetic-sparing responses *in vivo*. *Proc Natl Acad Sci U S A* 1997; 94:9950-5
- Stone LS, MacMillan LB, Kitto KF, Limberd LE, Wilcox GL: The  $\alpha_{2A}$  adrenergic receptor subtype mediates spinal analgesia evoked by  $\alpha_{2A}$  agonist and is necessary for spinal adrenergic-opioid synergy. *J Neurosci* 1997; 17:17157-65
- Mizobe T, Maghsoudi K, Sitwala K, Tzanzhi G, Ou J, Maze M: Antisense technology reveals the  $\alpha_{2A}$  adrenoceptor to be the subtype mediating the hypnotic response to the highly selective agonist, dexmedetomidine, in the locus coeruleus of the rat. *J Clin Invest* 1996; 98:1076-80
- Stone LS, Vulchanova L, Riedl MS, Wang J, Williams FG, Wilcox GL, Elde R: Effects of peripheral nerve injury on alpha-2A and alpha-2C adrenergic receptor immunoreactivity in the rat spinal cord. *Neuroscience* 1999; 93:1399-407
- Stone LS, Broberger C, Vulchanova L, Wilcox GL, Hökfelt T, Riedl MS, Elde R: Differential distribution of alpha-2A and alpha-2C adrenergic receptor immunoreactivity in the rat spinal cord. *J Neurosci* 1998; 18:5928-37
- Fairbanks CA, Stone LS, Kitto KF, Nguyen HO, Posthumus IJ, Wilcox GL: Alpha-2C-adrenergic receptors mediate spinal analgesia and adrenergic-opioid synergy. *J Pharmacol Exp Ther* 2002; 300:282-90
- Kim SH, Chung JM: An experimental model of peripheral neuropathy produced by segmental spinal nerve ligation in the rat. *Pain* 1993; 50:355-63
- Yaksh TL, Rudy TA: Chronic catheterization of the spinal subarachnoid space. *Physiol Behav* 1976; 7:1032-6
- Taiwo YO,Coderre TJ, Levine JD: The contribution of training to sensitivity in the nociceptive paw-withdrawal test. *Brain Res* 1989; 487:148-51
- Bylund DB: Pharmacological characteristics of alpha-2 adrenergic receptor subtypes. *Ann N Y Acad Sci* 1995; 763:1-7
- Rosin DL, Zeng D, Stornetta R, Norton F, Riley T, Okusa M, Guyenet P, Lynch KR: Immunohistochemical localization of alpha 2A-adrenergic receptors in catecholaminergic and other brainstem neurons in the rat. *Neuroscience* 1993; 56:139-55
- Zeng D, Lynch KR: Distribution of alpha 2-adrenergic receptor mRNAs in the rat CNS. *Brain Res Mol Brain Res* 1991; 10:219-25
- Rosin DL, Talley EM, Lee A, Stornetta RL, Gaylinn BD, Guyenet PG, Lynch KR: Distribution of alpha 2C-adrenergic receptor-like immunoreactivity in the rat central nervous system. *J Comp Neurol* 1996; 372:155-65
- Millan MJ: Evidence that an alpha 2A-adrenoceptor subtype mediates antinociception in mice. *Eur J Pharmacol* 1992; 215:355-6
- Hunter JC, Fontana DJ, Hedley LR, Jasper JR, Lewis R, Link RE, Secchi R, Sutton J, Eglen RM: Assessment of the role of alpha-2 adrenoceptor subtypes in the antinociceptive, sedative and hypothermic action of dexmedetomidine in transgenic mice. *Br J Pharmacol* 1997; 122:1339-44
- Ono H, Mishima A, Ono S, Fukuda H, Vasko MR: Inhibitory effects of clonidine and tizanidine on release of substance P from slices of rat spinal cord and antagonism by alpha-adrenergic receptor antagonists. *Neuropharmacology* 1991; 30:585-9
- Takano Y, Yaksh TL: Characterization of the pharmacology of intrathecally administered alpha-2 agonists and antagonists in rats. *J Pharmacol Exp Ther* 1992; 261:764-72
- Yaksh TL, Pogrel JW, Lee YW, Chaplan SR: Reversal of nerve ligation-induced allodynia by spinal alpha-2 adrenoceptor agonists. *J Pharmacol Exp Ther* 1995; 272:207-14
- Malmberg AB, Hedley LR, Jasper JR, Hunter JC, Basbaum AI: Contribution of alpha-2 receptor subtypes to nerve injury-induced pain and its regulation by dexmedetomidine. *Br J Pharmacol* 2001; 132:1827-36
- Khasar SG, Green PG, Chou B, Levine JD: Peripheral nociceptive effects of alpha 2-adrenergic receptor agonists in the rat. *Neuroscience* 1995; 66:427-32
- Aley KO, Levine JD: Multiple receptors involved in peripheral alpha 2, mu, and A1 antinociception, tolerance, and withdrawal. *J Neurosci* 1997; 17:735-44
- Scriabine A, Sweet CS, Ludden CT, Stavorski JM, Wenger HC, Bohidar NR: Some cardiovascular effects of ST-91 and clonidine. *Eur J Pharmacol* 1977; 43:333-41
- Dowlathshahi P, Yaksh TL: Differential effects of two intraventricularly injected  $\alpha_2$  agonists, ST-91 and dexmedetomidine, on electroencephalogram, feeding, and electromyogram. *Anesth Analg* 1997; 84:133-8
